# Supplementary material for: Synthesis and Biological Activity of Benzamides Substituted with Pyridine-Linked 1,2,4-Oxadiazole
Source: PubMed Central journal article supplement (PMC7435590; doi:10.3390/molecules25153500), 2020-07-31
Supplement: molecules-25-03500-s001.pdf [file molecules-25-03500-s001.pdf]

# Supporting Information

## Synthesis and Biological Activity of Benzamides Substituted with Pyridine-linked 1,2,4-oxadiazole

Sen Yang, Xiao-Yu Tian, Tian-Yang Ma, Li Dai, Chao-Li Ren, Jun-Chang Mei, Xing-Hai Liu,  
Cheng-Xia, Tan\*

1.  $^1\text{H}$  NMR spectra of **7a~7n**.....S1-S14
2.  $^{13}\text{C}$  NMR spectra of **7a~7n**.....S15-S28
3. ESI-HRMS spectra of **7a~7n**.....S29-42

# 1. <sup>1</sup>H NMR spectra of 7a~7n

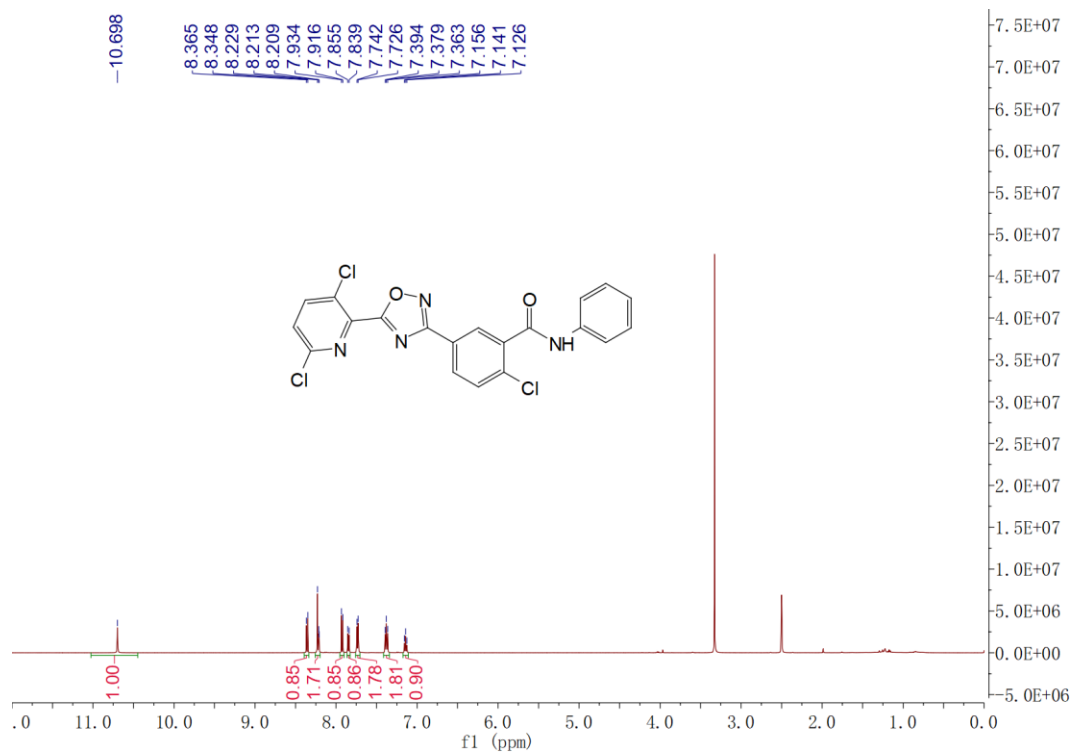

Figure S1 <sup>1</sup>H NMR spectra of 7a

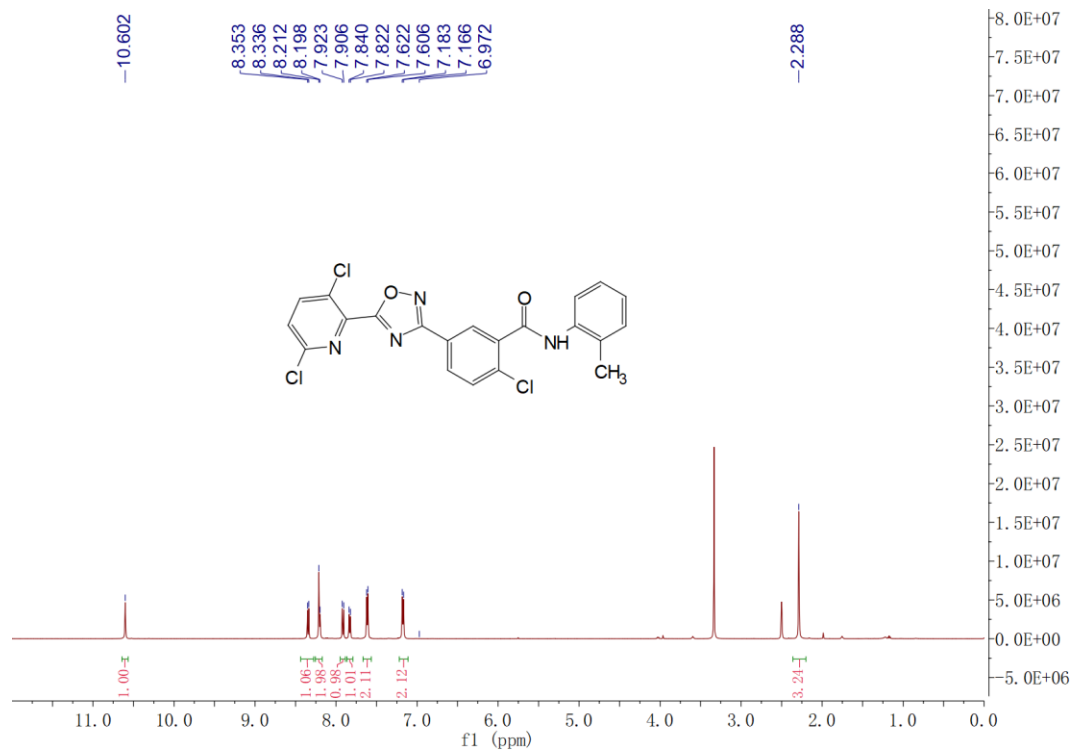

Figure S2 <sup>1</sup>H NMR spectra of 7b

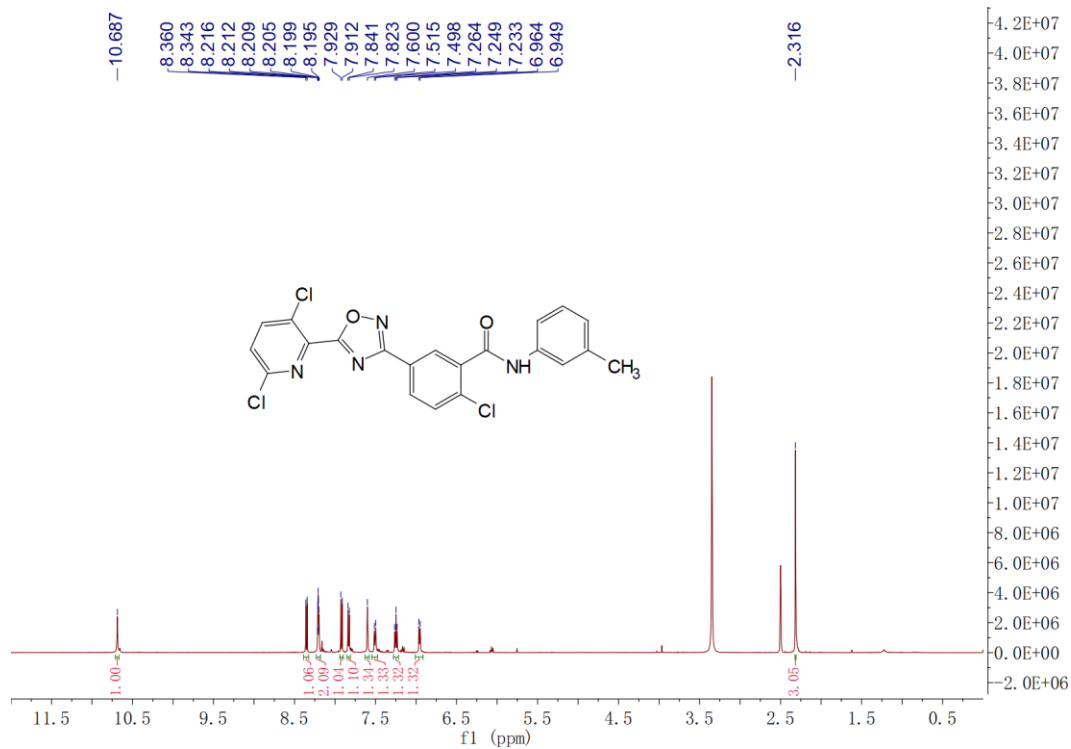

Figure S3  $^1\text{H}$  NMR spectra of 7c

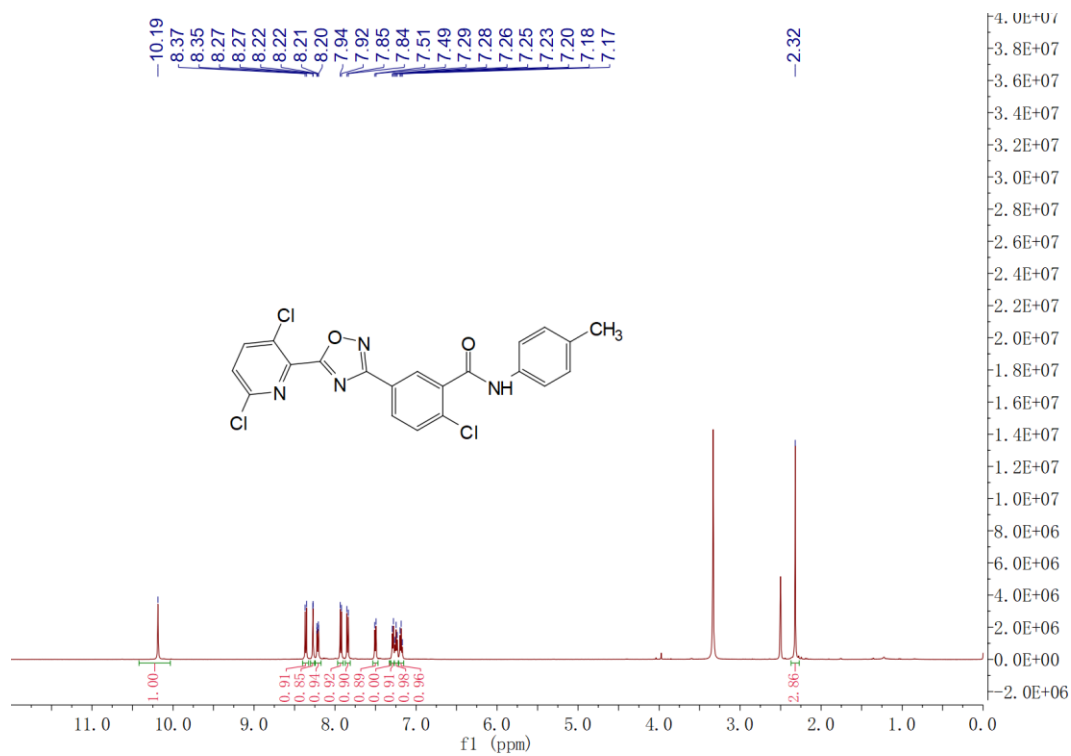

Figure S4  $^1\text{H}$  NMR spectra of 7d

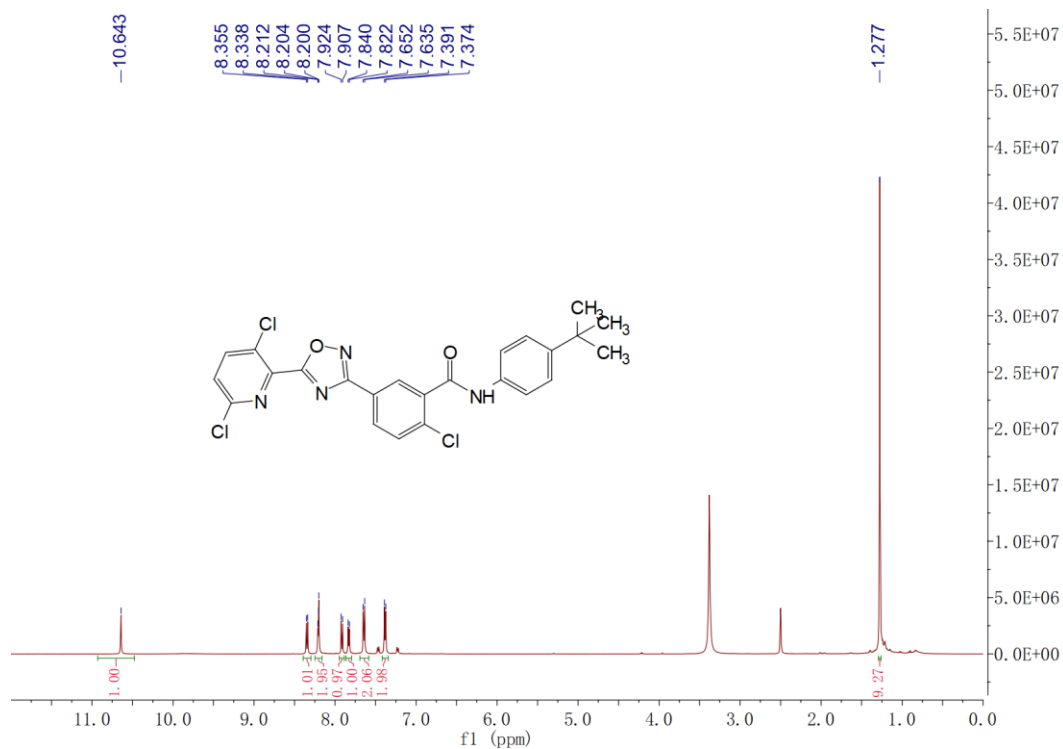

Figure S5 <sup>1</sup>H NMR spectra of 7e

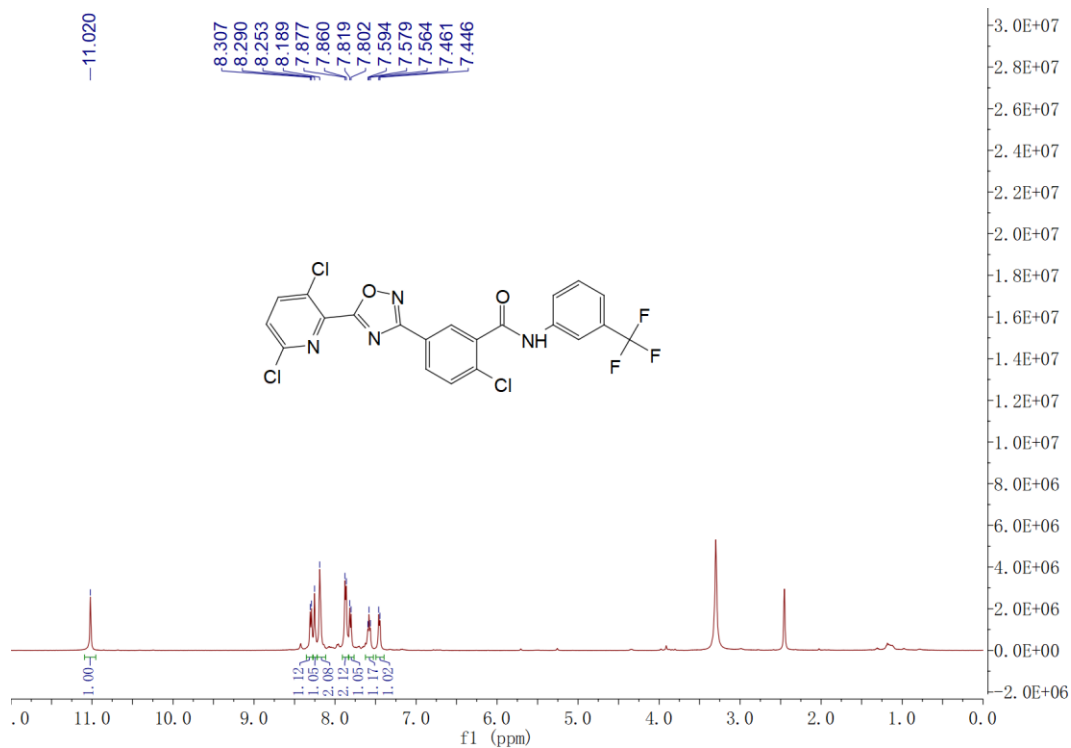

Figure S6 <sup>1</sup>H NMR spectra of 7f

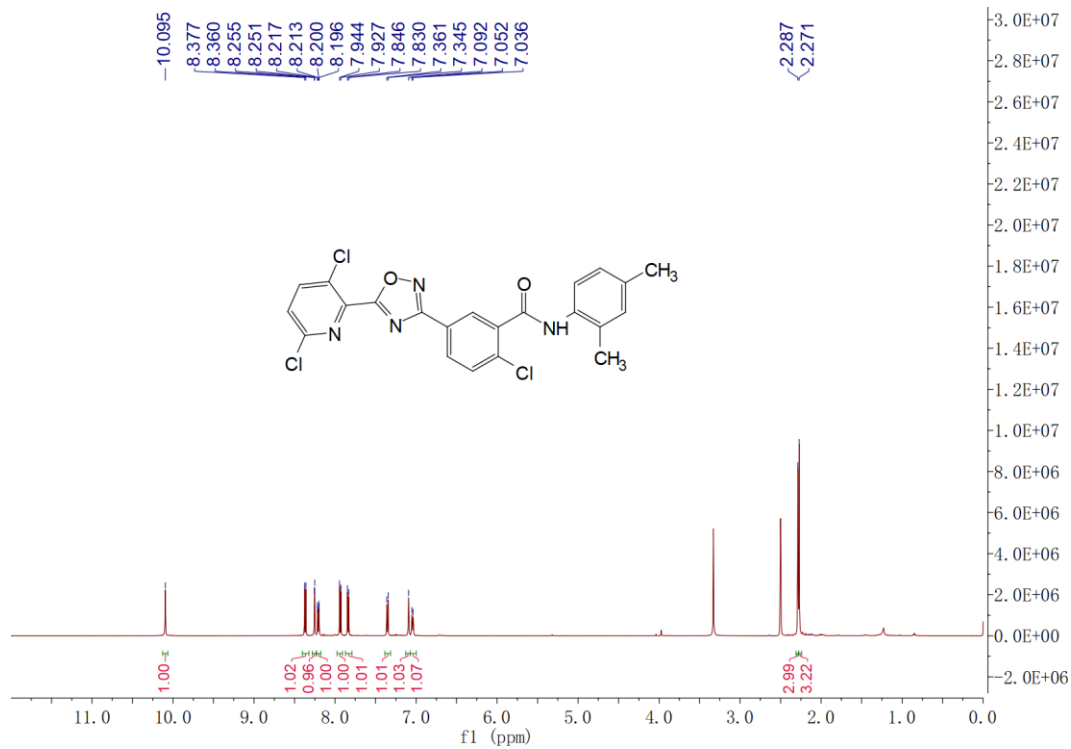

Figure S7 <sup>1</sup>H NMR spectra of 7g

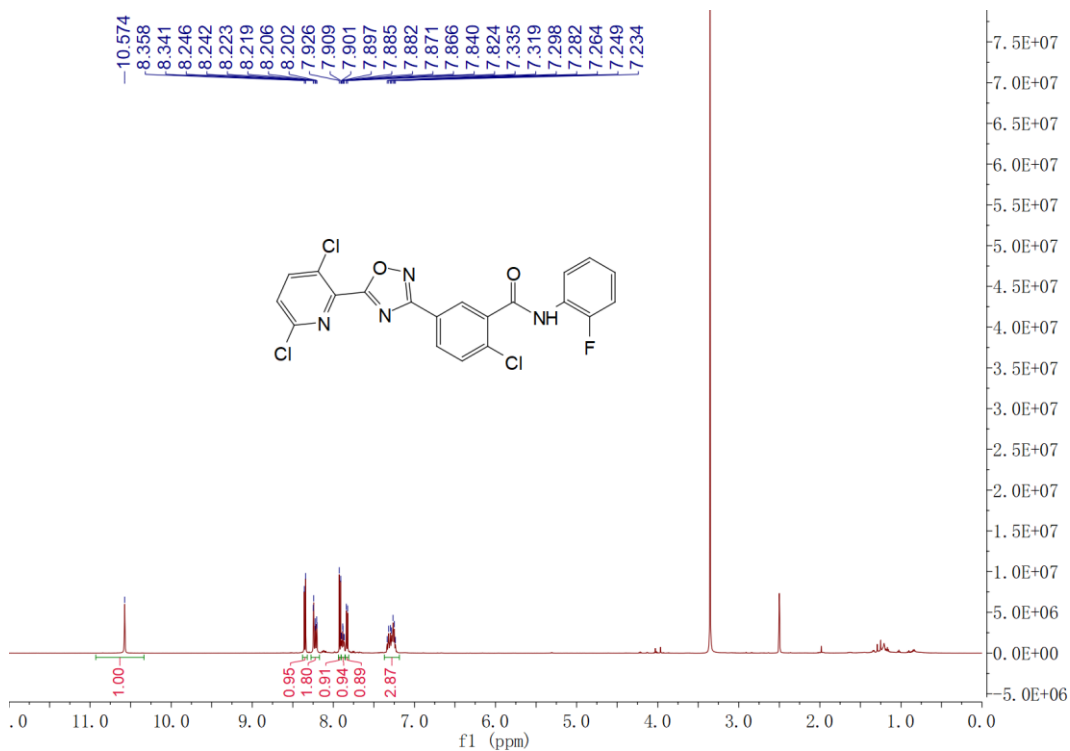

Figure S8 <sup>1</sup>H NMR spectra of 7h

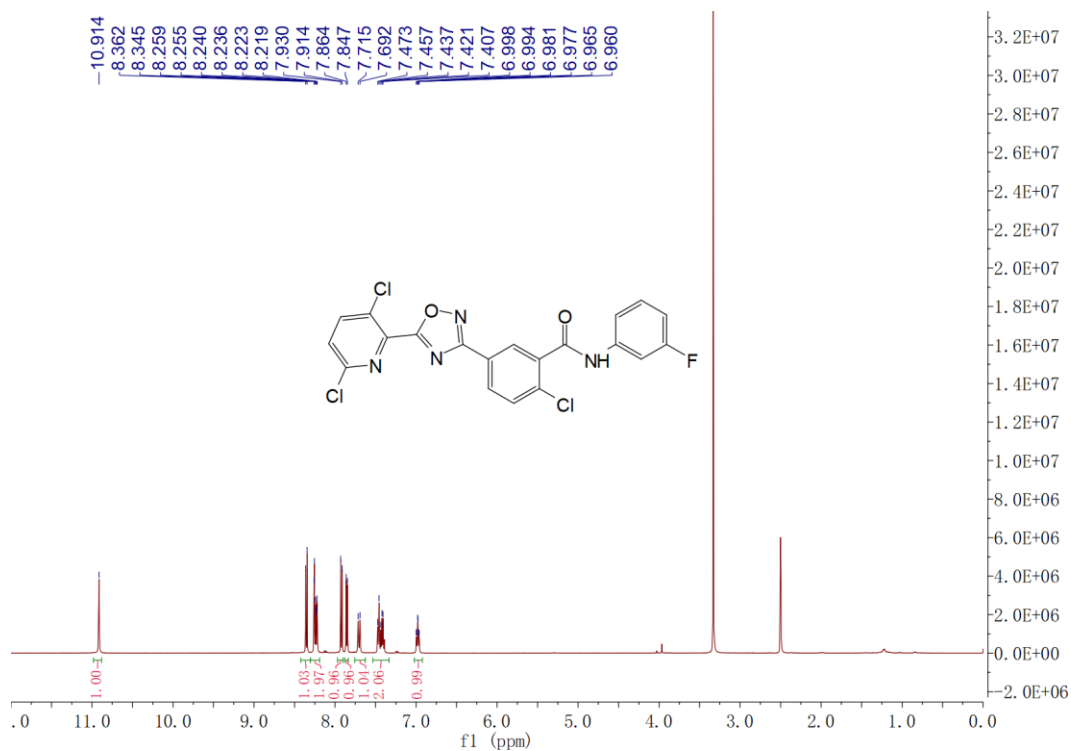

Figure S9  $^1\text{H}$  NMR spectra of 7i

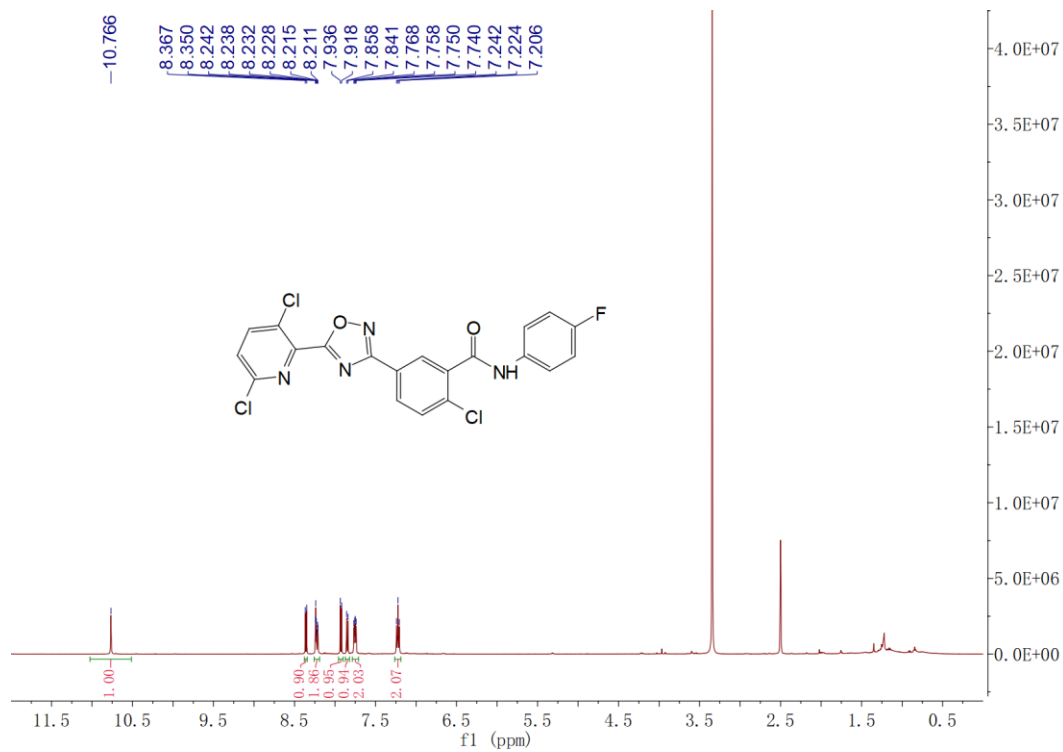

Figure S10  $^1\text{H}$  NMR spectra of 7j

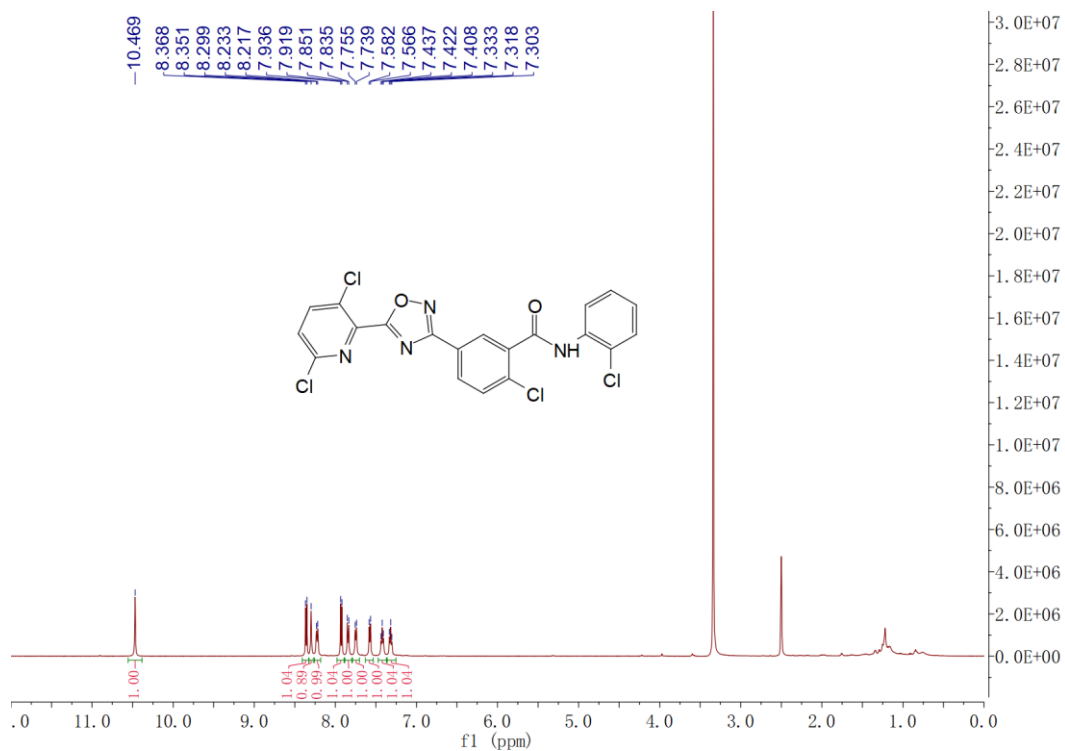

Figure S11 <sup>1</sup>H NMR spectra of 7k

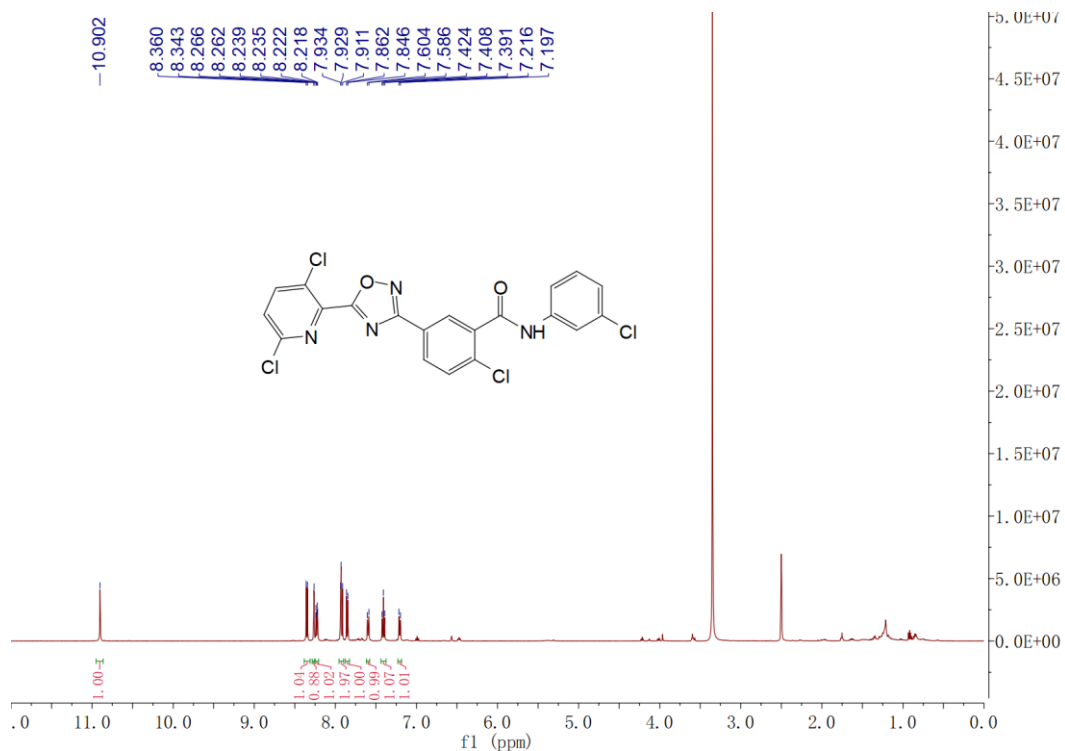

Figure S12 <sup>1</sup>H NMR spectra of 7l

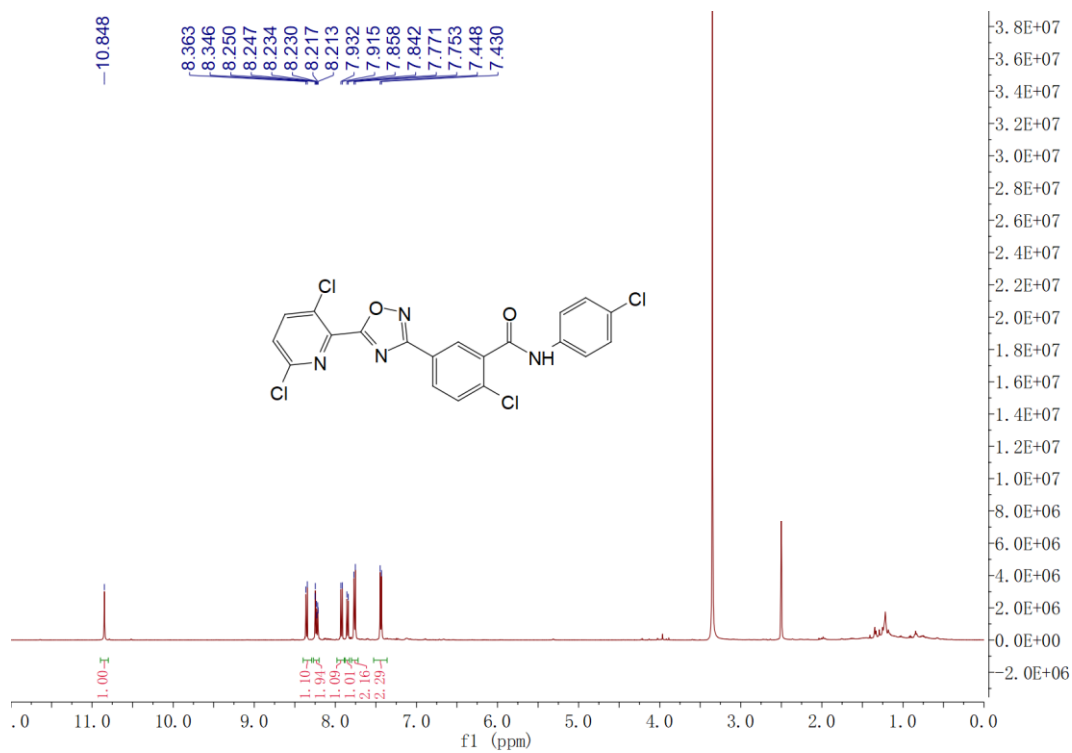

Figure S13 <sup>1</sup>H NMR spectra of 7m

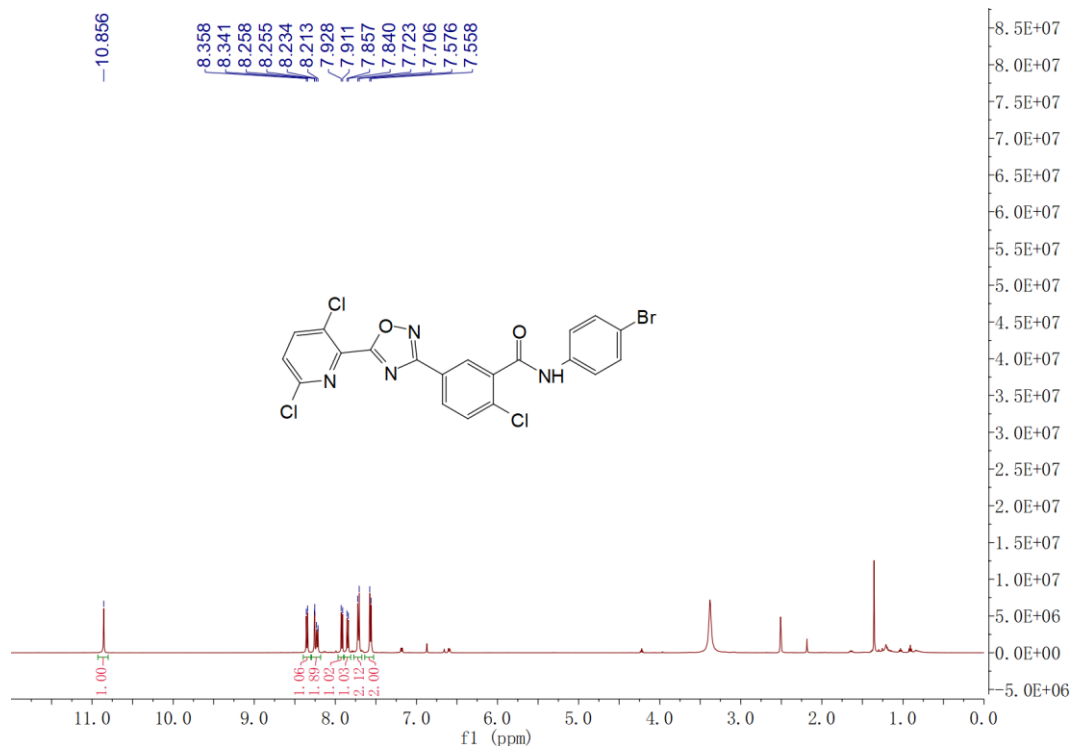

Figure S14 <sup>1</sup>H NMR spectra of 7n



## 2. $^{13}\text{C}$ NMR spectra of 7a~7n

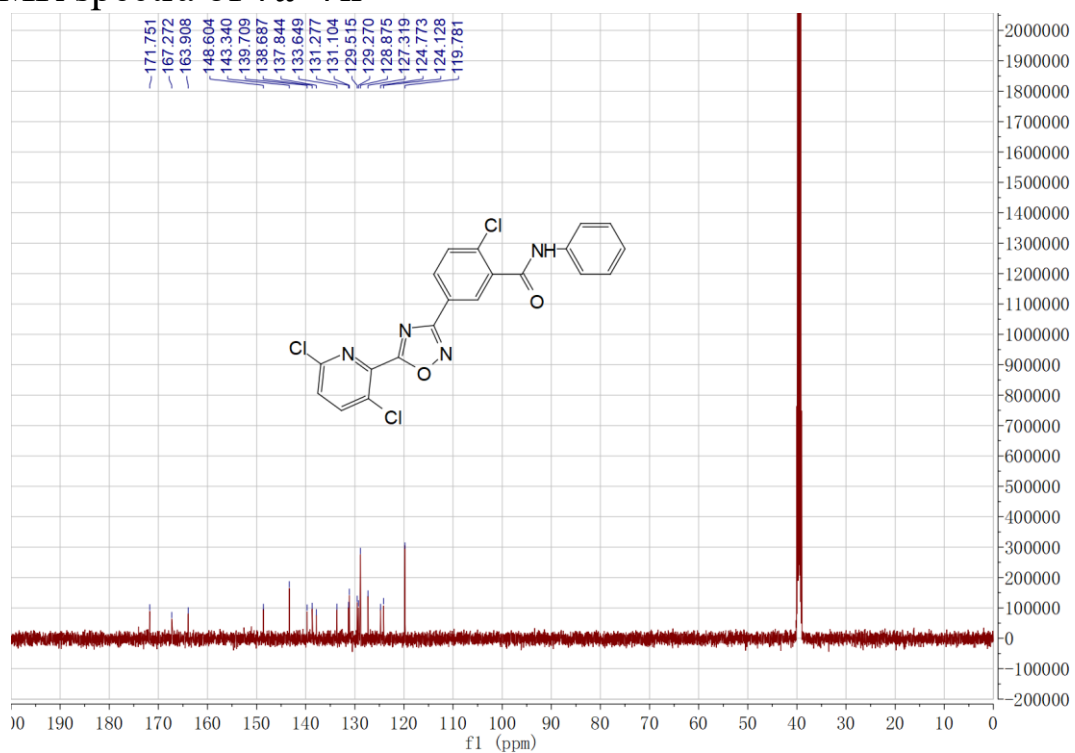

Figure S15  $^{13}\text{C}$  NMR spectra of 7a

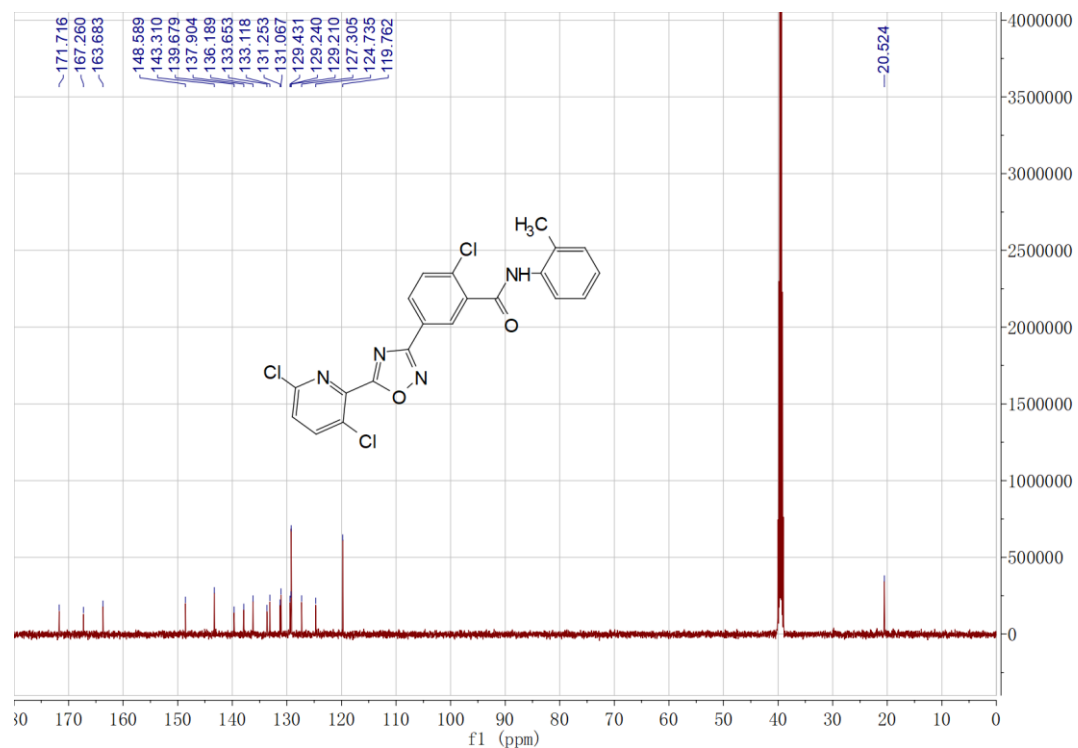

Figure S16  $^{13}\text{C}$  NMR spectra of 7b

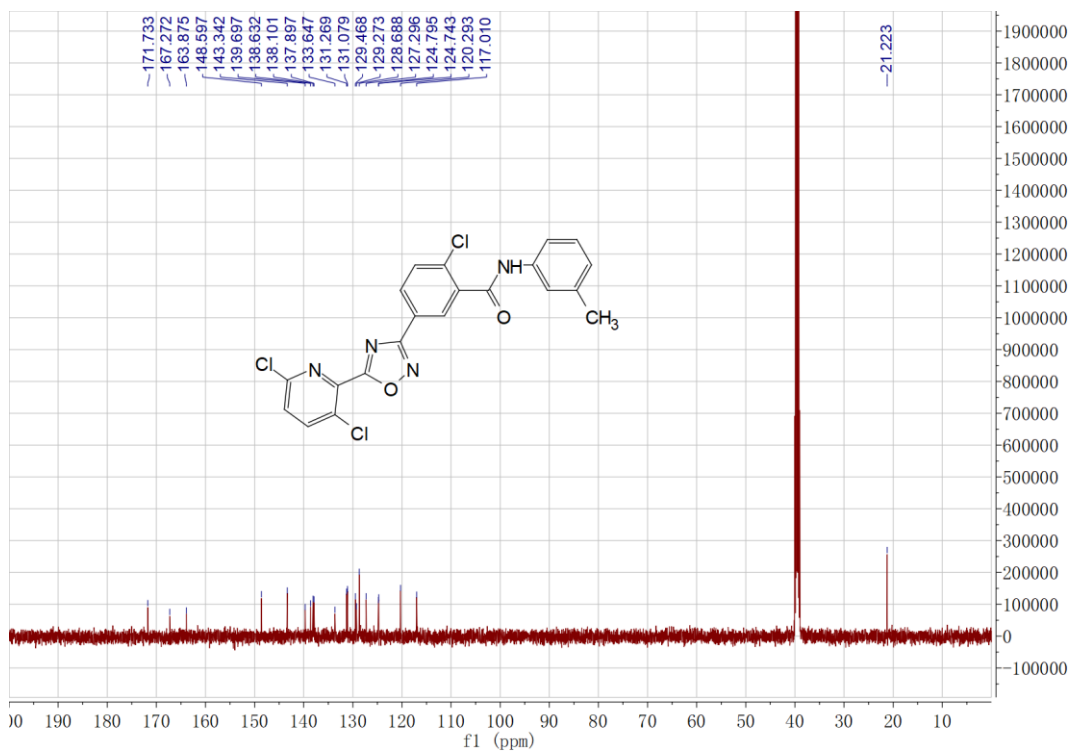

Figure S17  $^{13}\text{C}$  NMR spectra of 7c

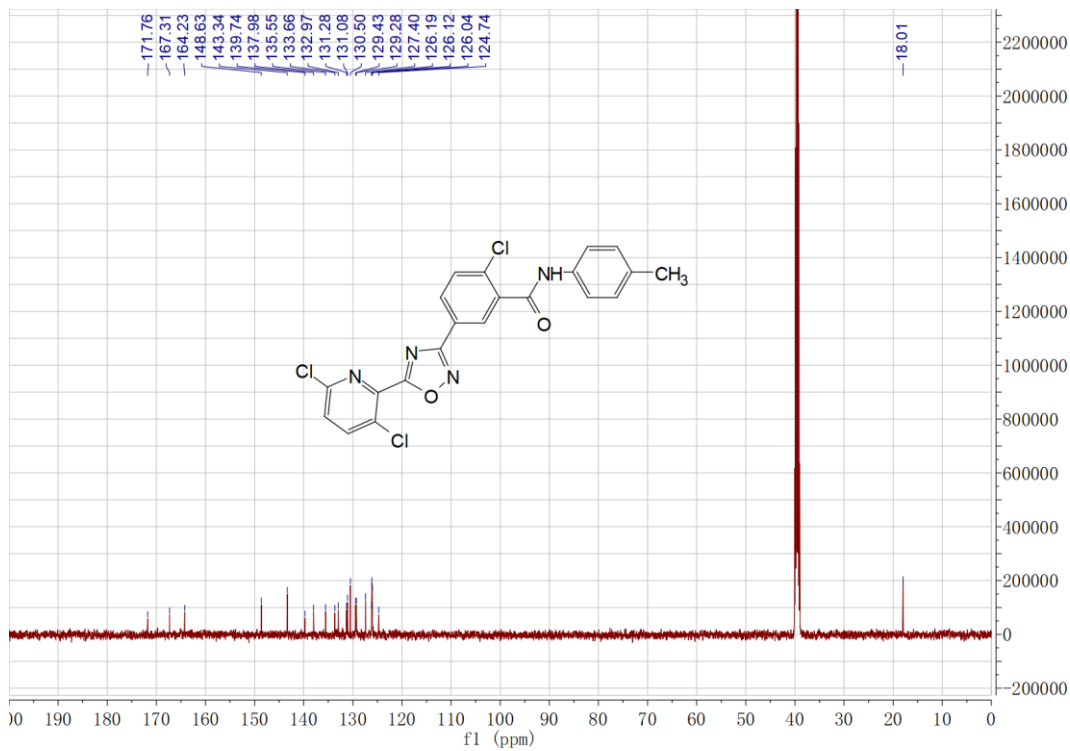

Figure S18  $^{13}\text{C}$  NMR spectra of 7d

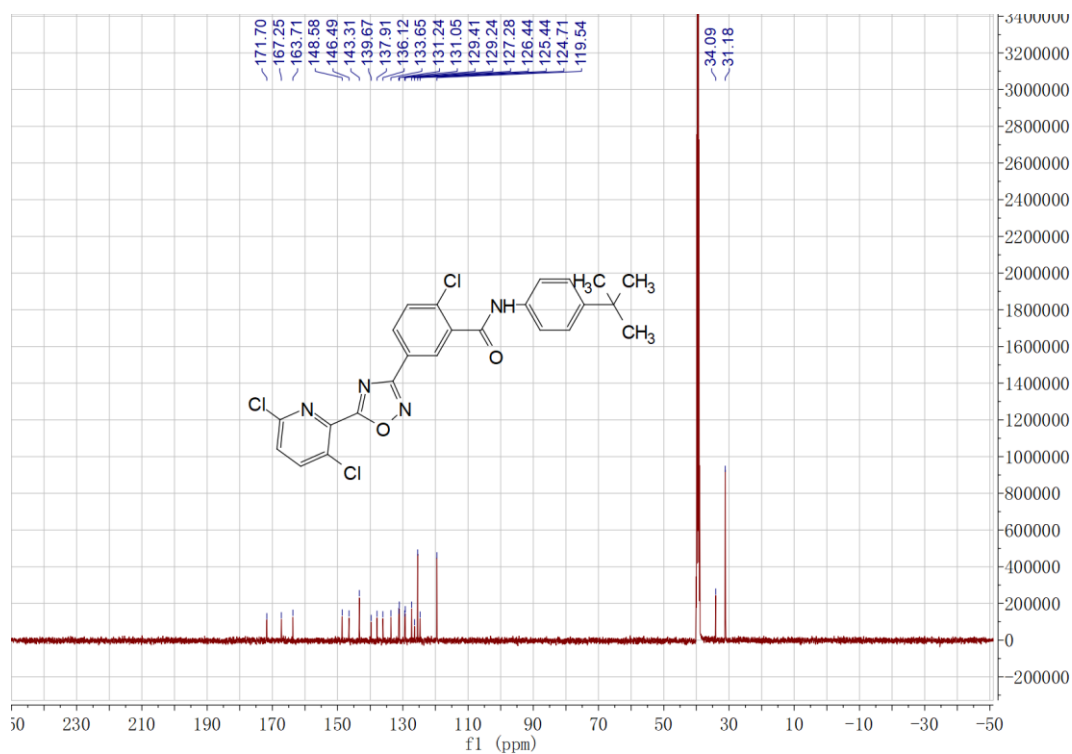

Figure S19  $^{13}\text{C}$  NMR spectra of 7e

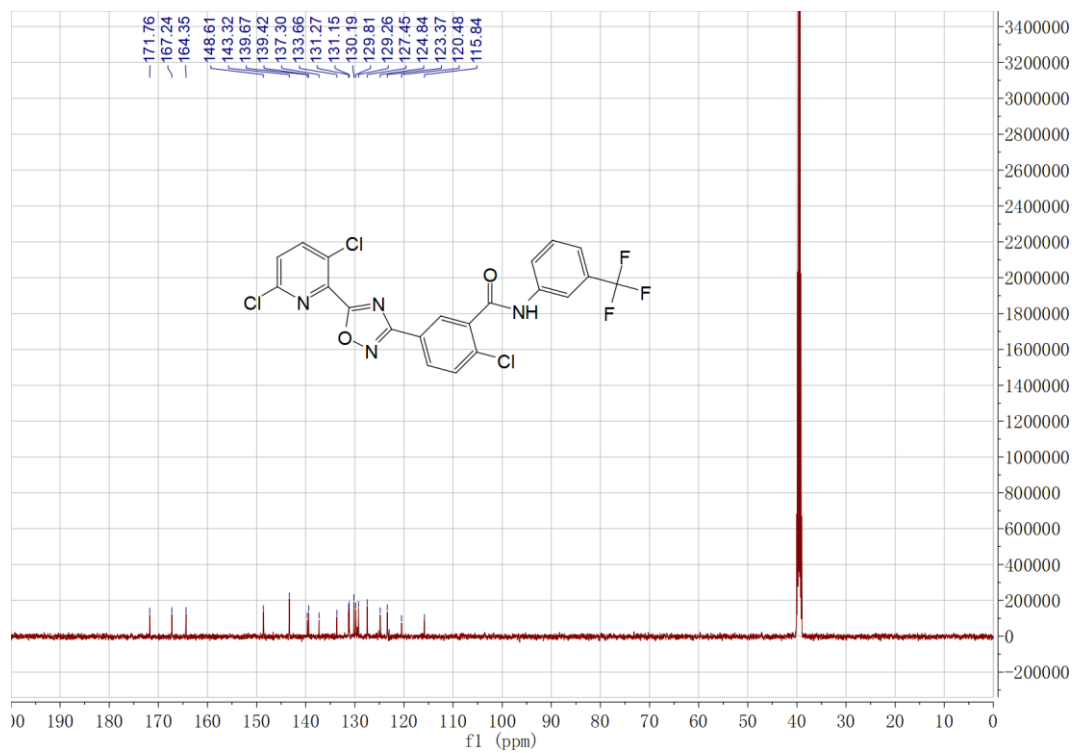

Figure S20  $^{13}\text{C}$  NMR spectra of 7f

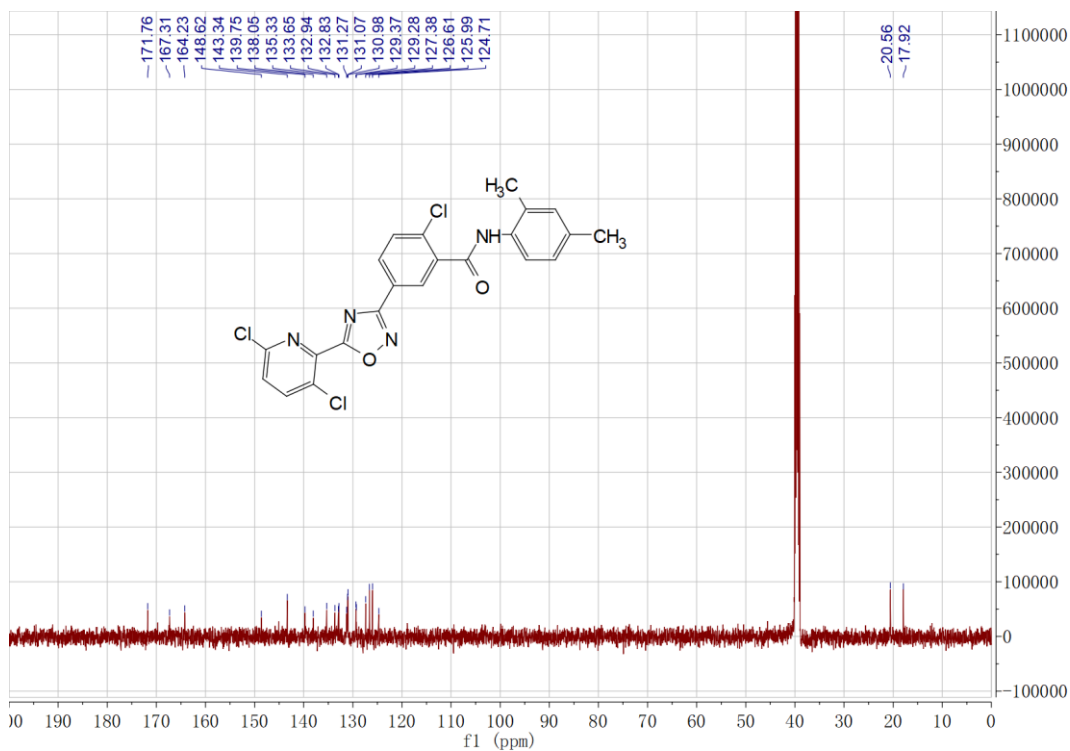

Figure S21  $^{13}\text{C}$  NMR spectra of 7g

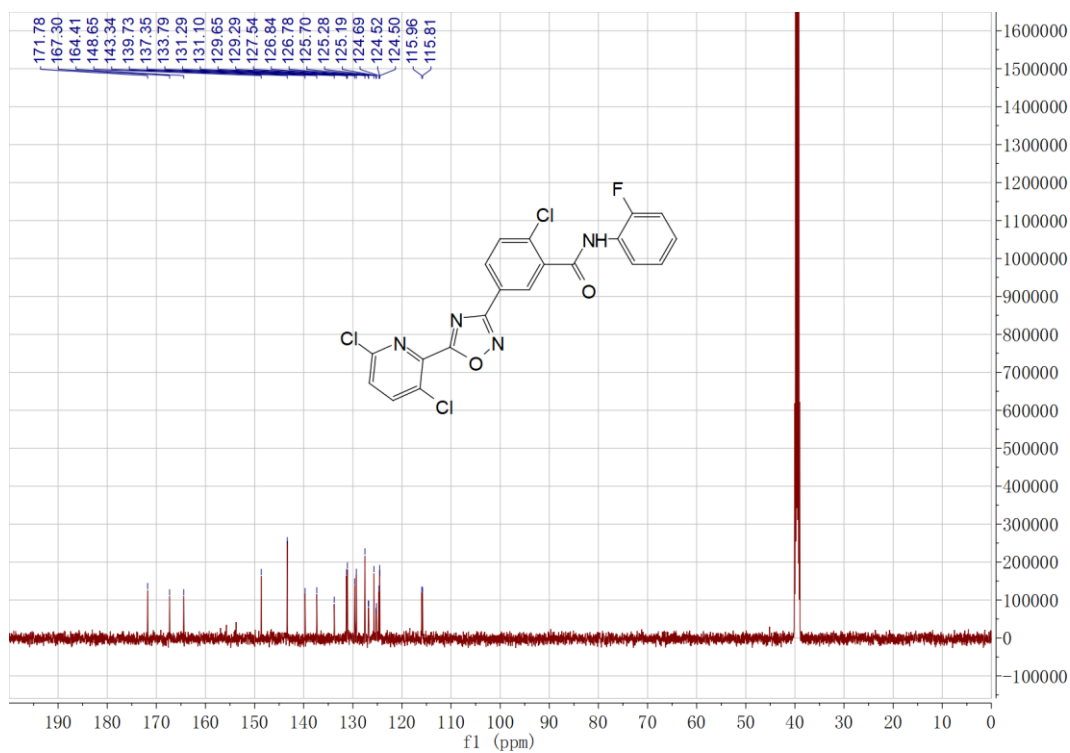

Figure S22  $^{13}\text{C}$  NMR spectra of 7h

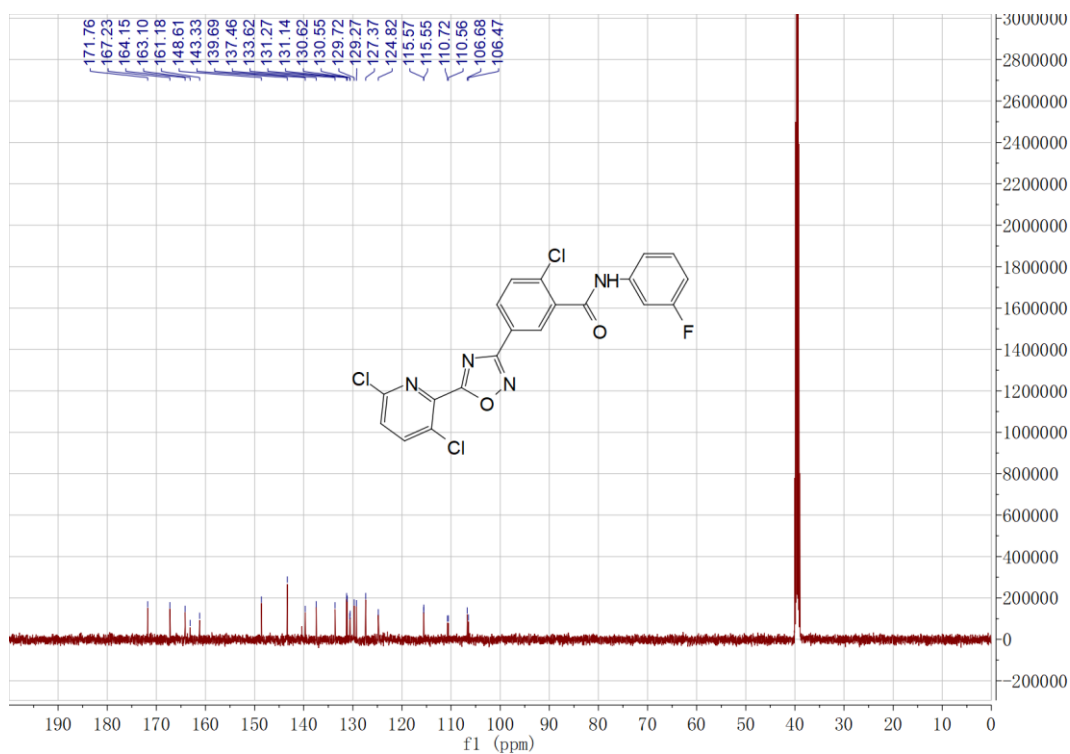

Figure S23  $^{13}\text{C}$  NMR spectra of 7i

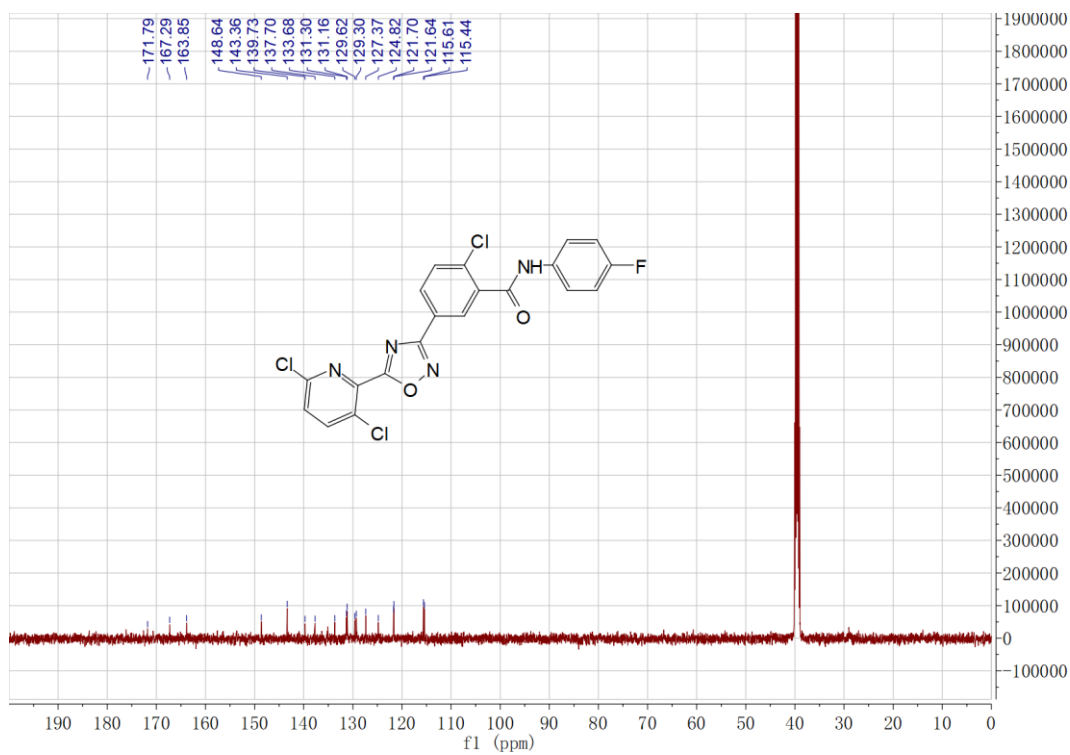

Figure S24  $^{13}\text{C}$  NMR spectra of 7j

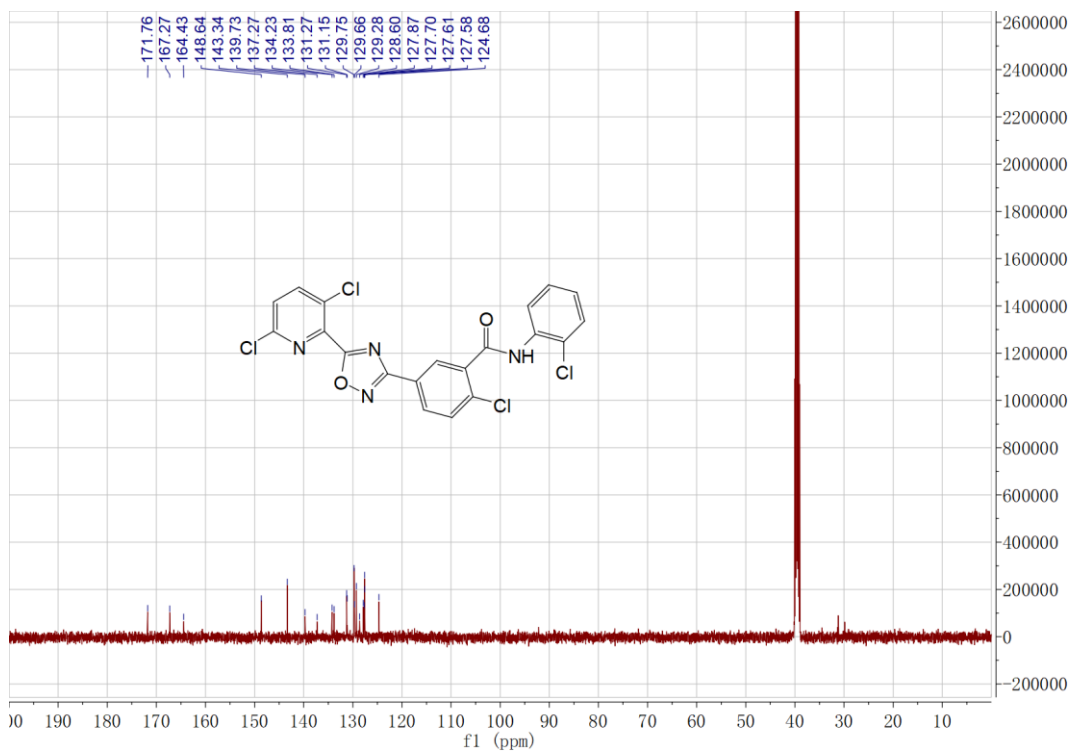

Figure S25  $^{13}\text{C}$  NMR spectra of 7k

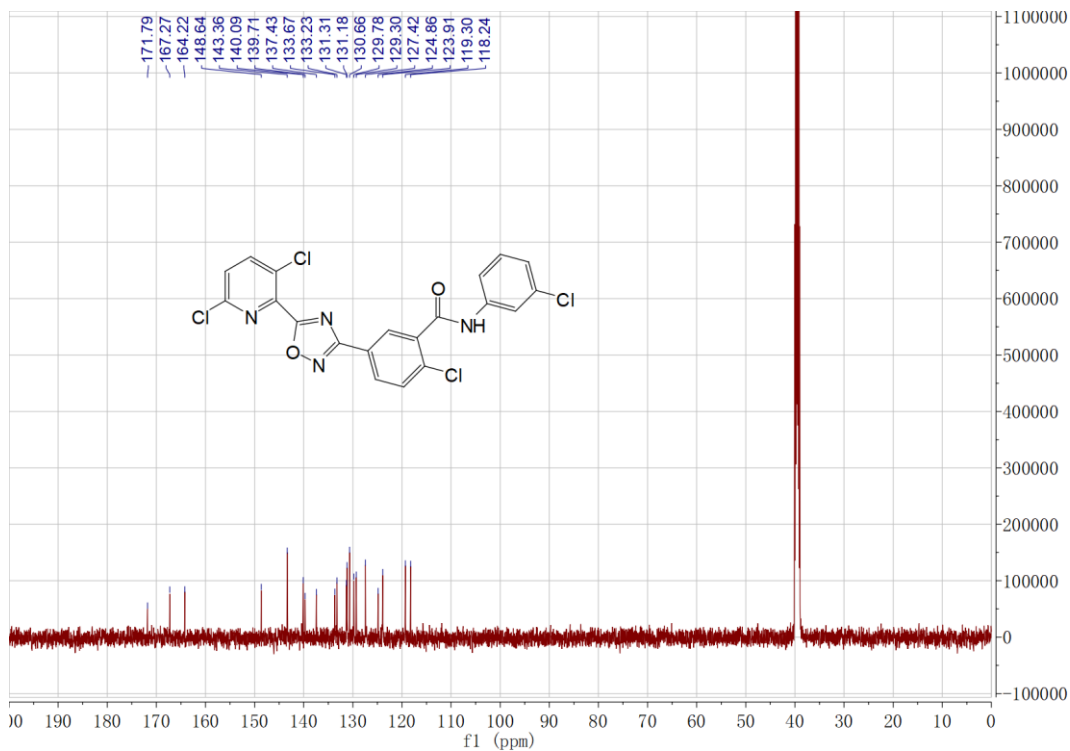

Figure S26  $^{13}\text{C}$  NMR spectra of 7l

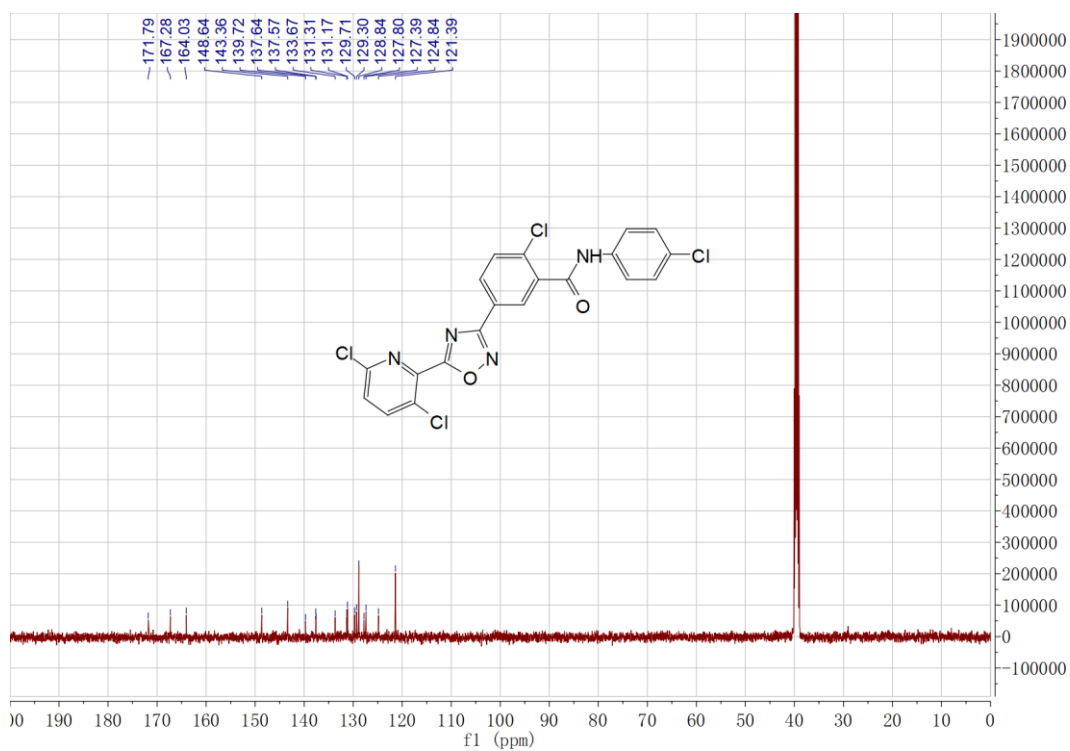

Figure S27 <sup>13</sup>C NMR spectra of 7m

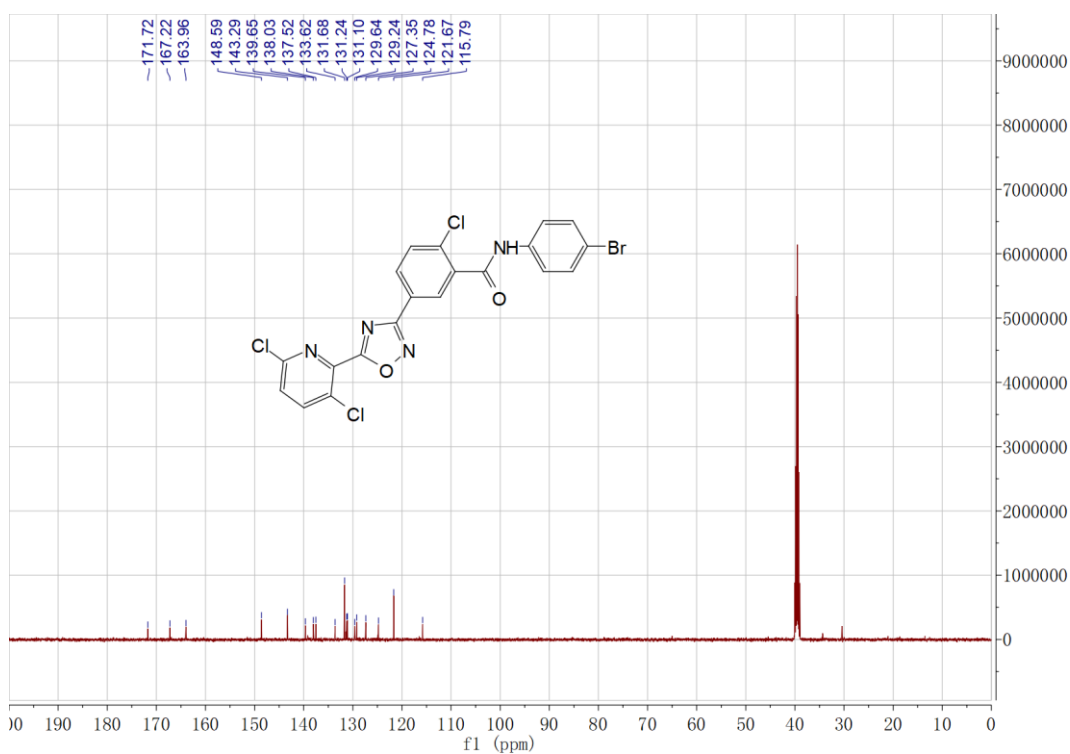

Figure S28 <sup>13</sup>C NMR spectra of 7n

### 3. ESI-HRMS spectra of 7a~7n

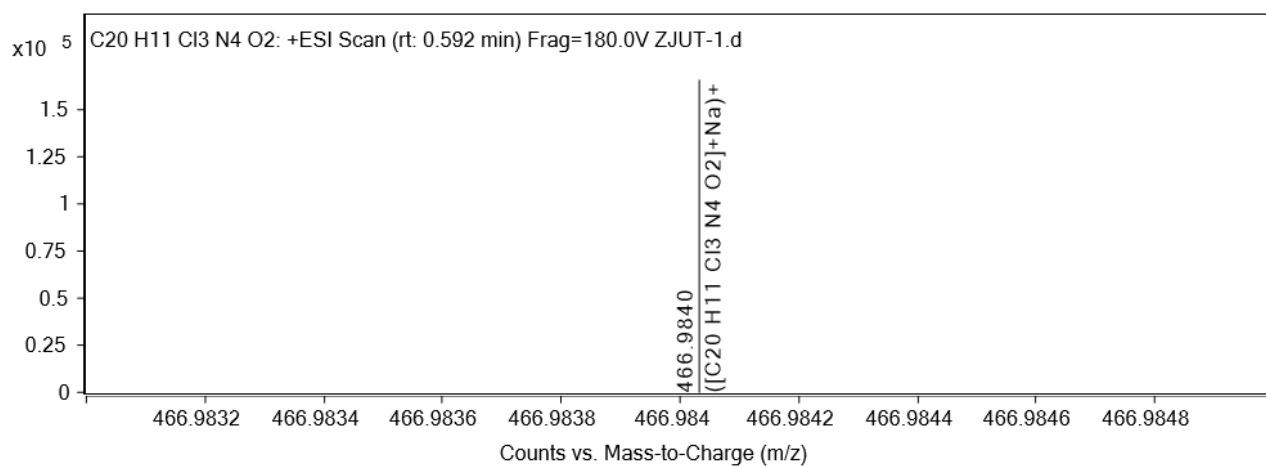

Figure S29 ESI-HRMS spectra of 7a

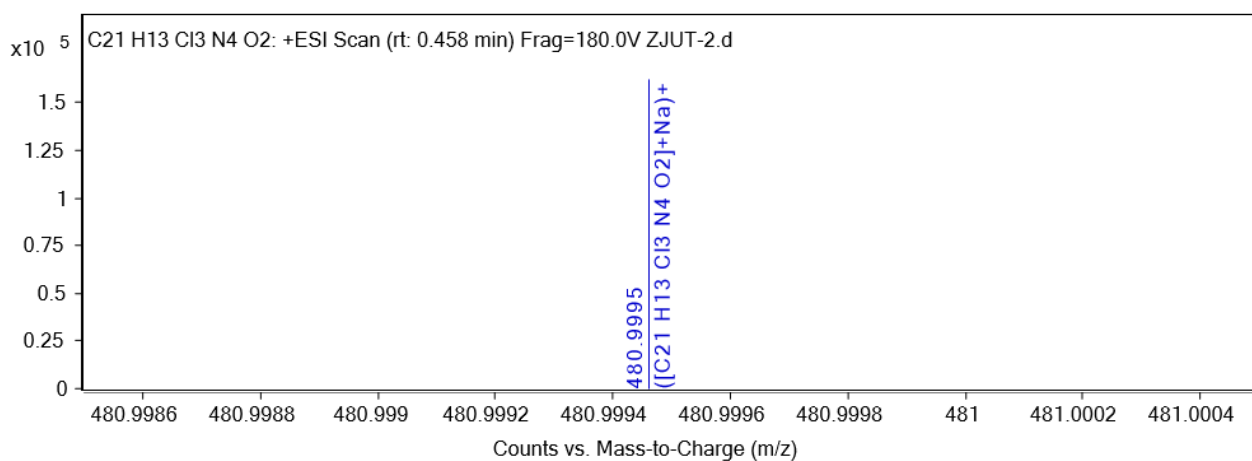

Figure S30 ESI-HRMS spectra of 7b

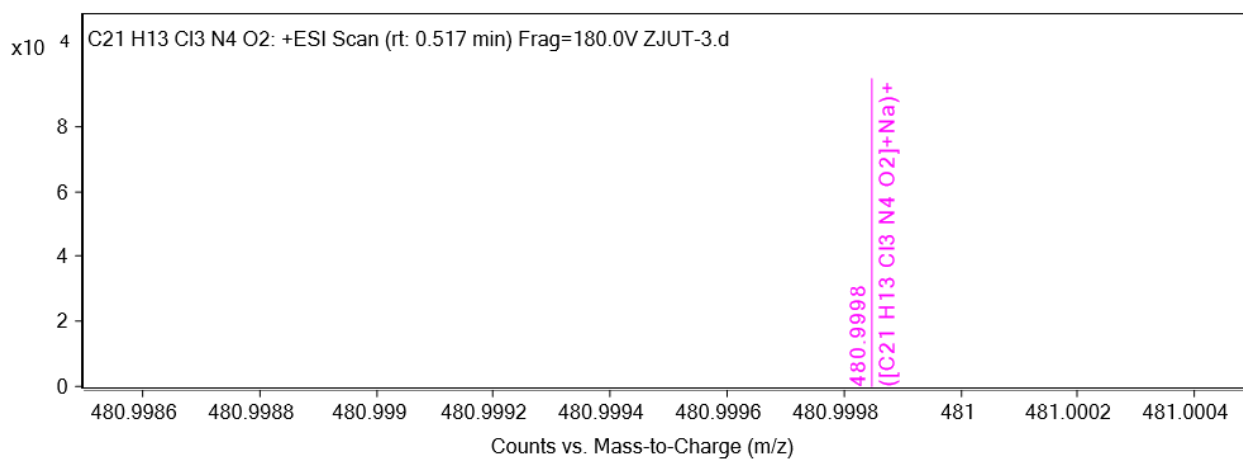

Figure S31 ESI-HRMS spectra of 7c



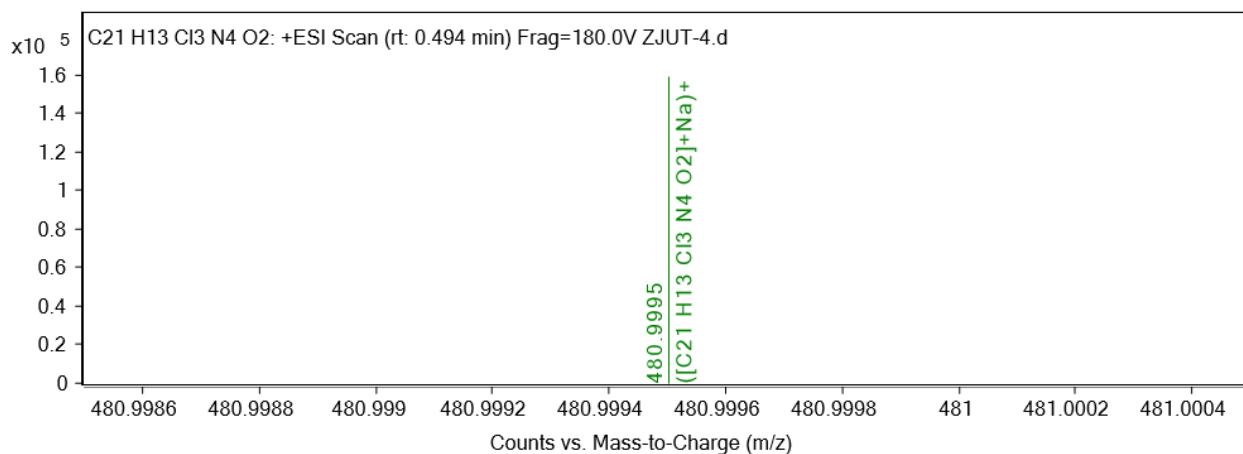

Figure S32 ESI-HRMS spectra of 7d

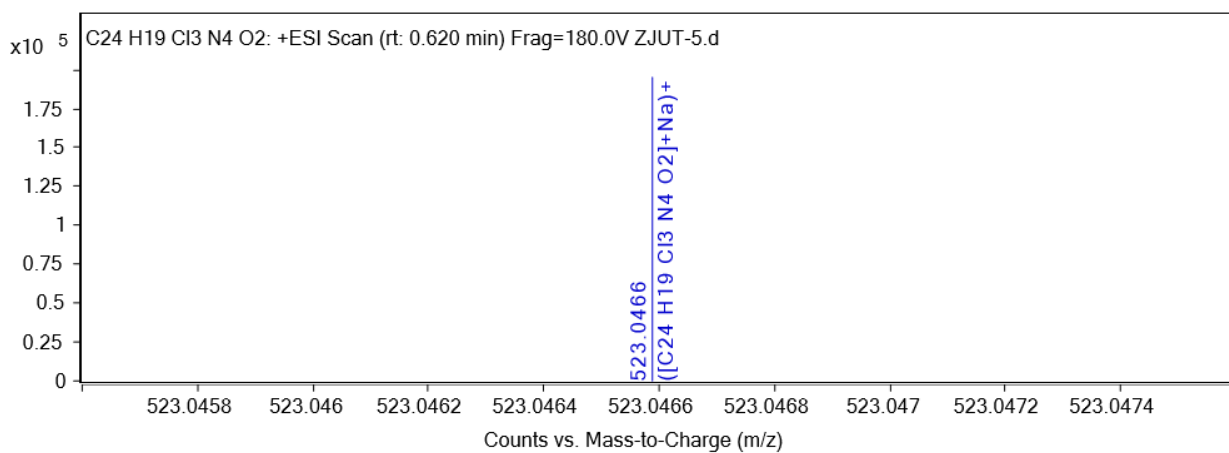

Figure S33 ESI-HRMS spectra of 7e

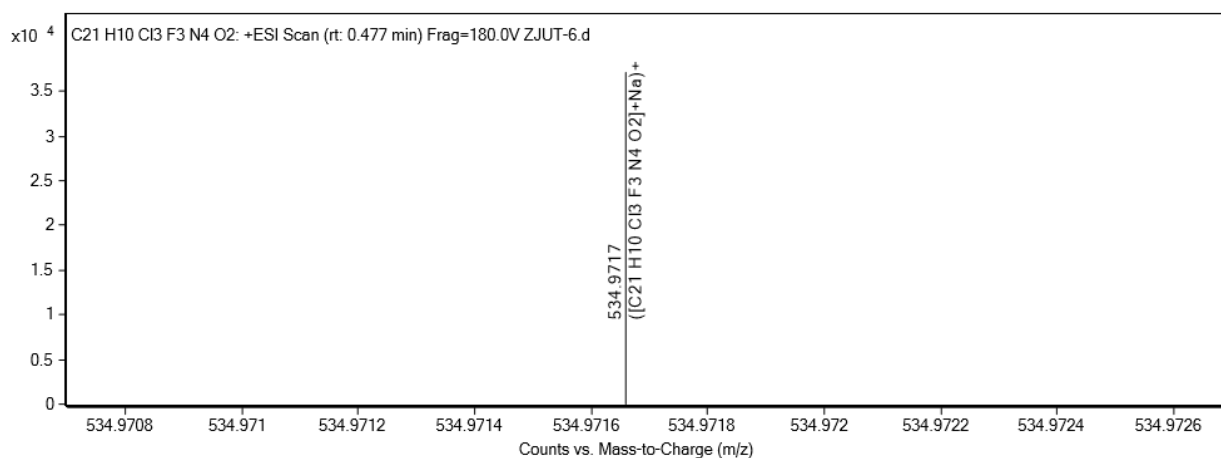

Figure S34 ESI-HRMS spectra of 7f

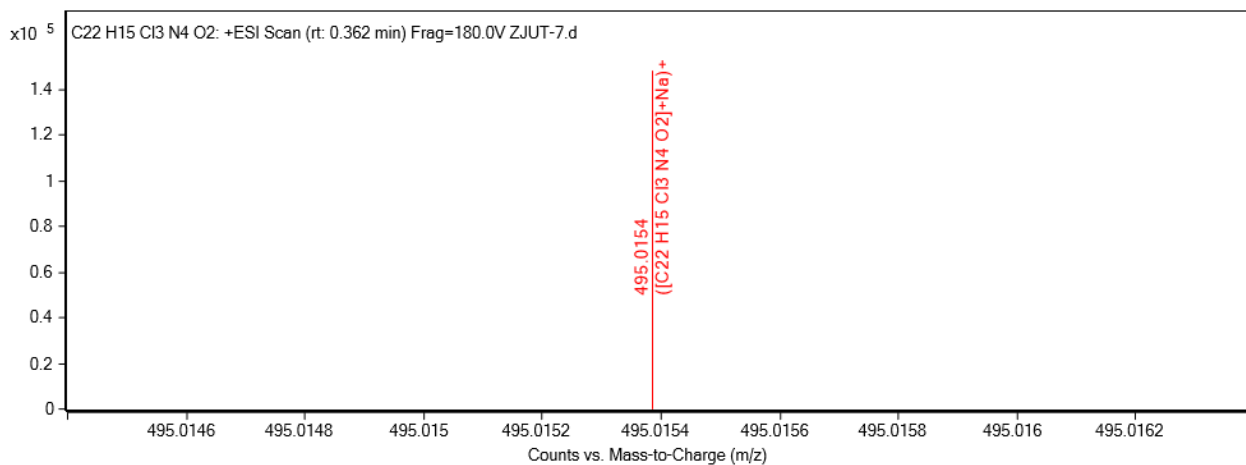

Figure S35 ESI-HRMS spectra of 7g

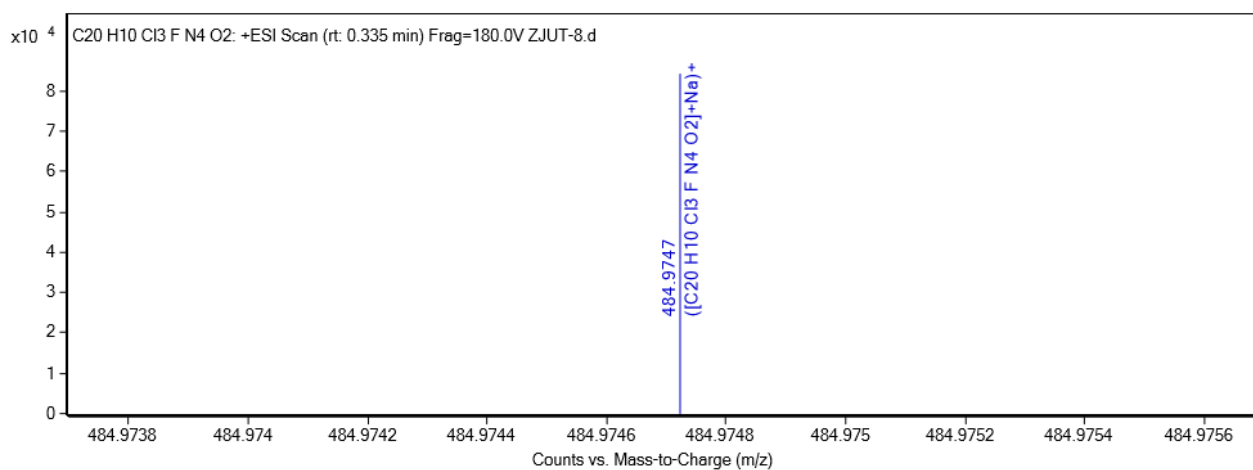

Figure S36 ESI-HRMS spectra of 7h

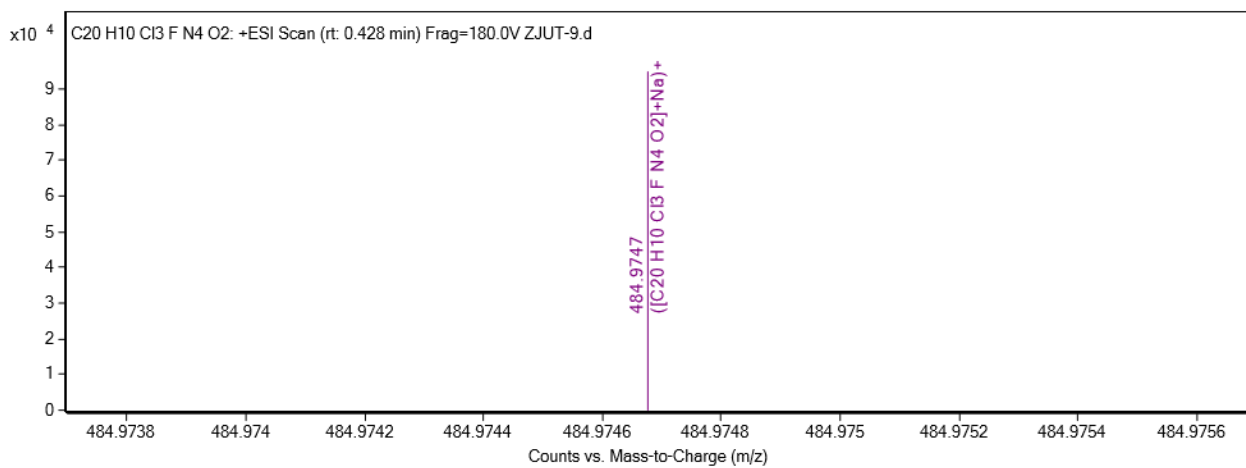

Figure S37 ESI-HRMS spectra of 7i

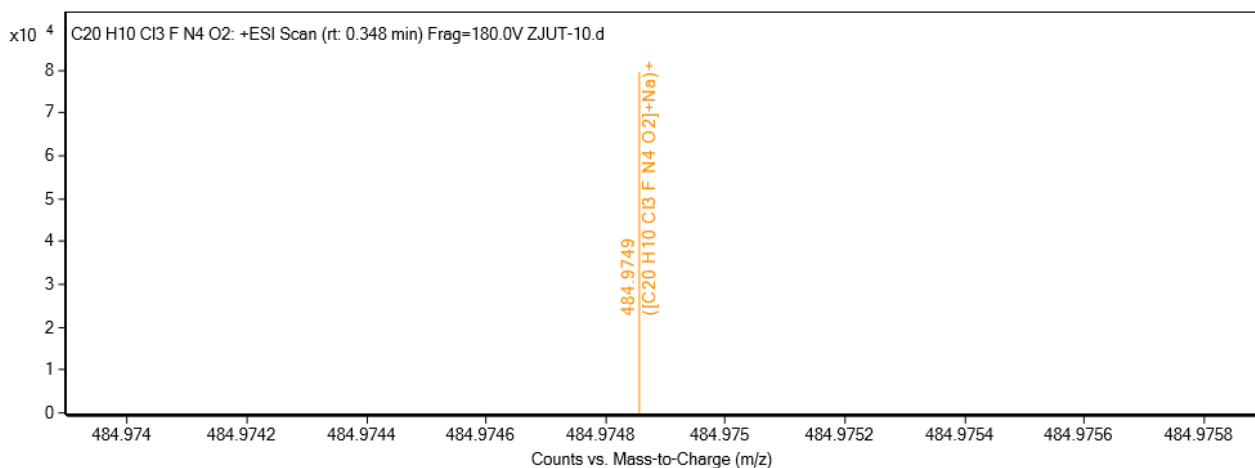

Figure S38 ESI-HRMS spectra of 7j

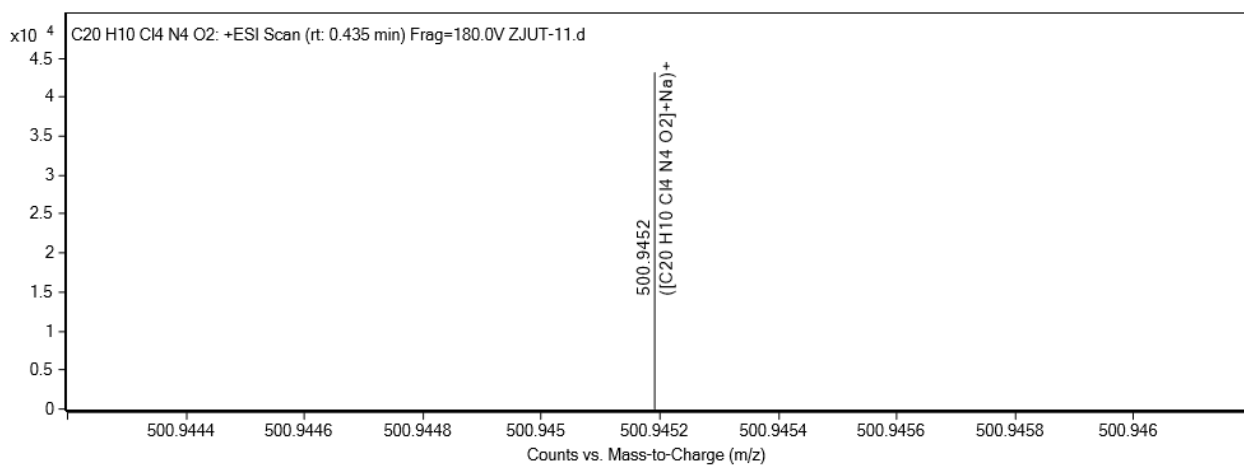

Figure S39 ESI-HRMS spectra of 7k

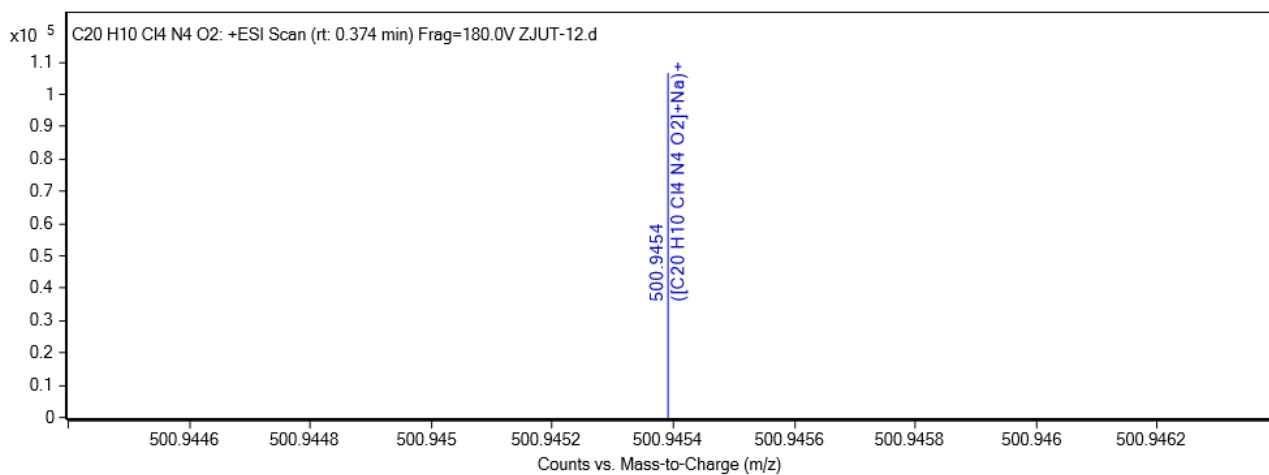

Figure S40 ESI-HRMS spectra of 7l

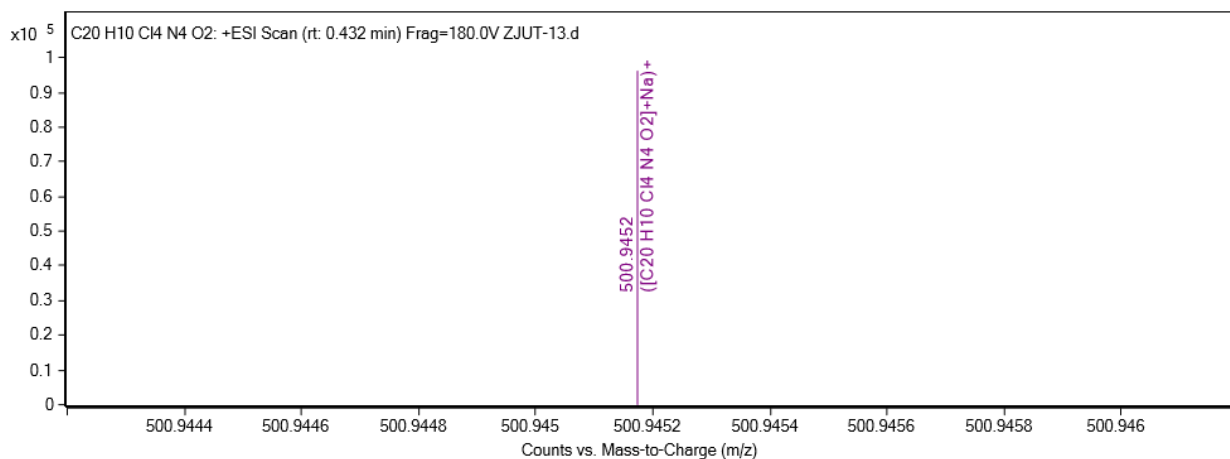

**Figure S41** ESI-HRMS spectra of **7m**

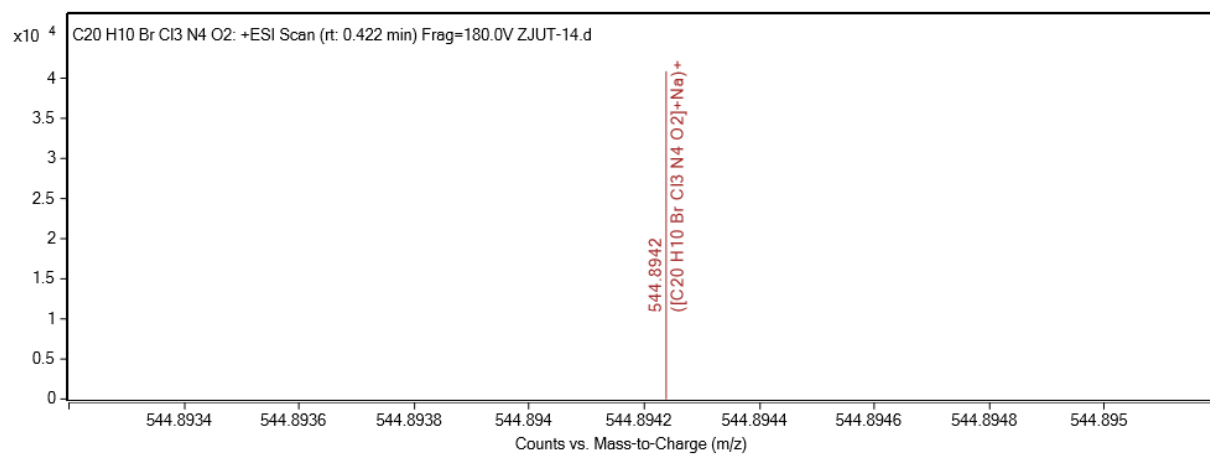

**Figure S42** ESI-HRMS spectra of **7n**
